# Supplementary material for: A Precise Microreaction Strategy to Overcome Trade-off Effect in Aromatic Nitration via Kinetic and Thermodynamic Regulation
Source: Research Square preprint supplement (doi:10.21203/rs.3.rs-6746374/v1), 2025-06-27
Supplement: Supplementary file 1 [file 8fbb8b417be55f5c70a39037.docx]

**Supplementary information**

**A Precise Microreaction Strategy to Overcome Trade-off Effect in Aromatic Nitration *via* Kinetic and Thermodynamic Regulation**

Jing Song, Zifei Yan, Tianyao Tang, Kai Wang, Yujun Wang, Jian Deng, Guangsheng Luo*

State Key Laboratory of Chemical Engineering and Low-Carbon Technology, Department of Chemical Engineering, Tsinghua University, Beijing 100084, China

*Corresponding author. Tel.: +86-10-62783870; E-mail: [gsluo@tsinghua.edu.cn](mailto:gsluo@tsinghua.edu.cn)

**Table of Contents**

[1. Derivation of Eq. (1) 3](#_Toc199069289)

[2. Derivation of Eq. (2) 4](#_Toc199069290)

[3. Reaction network of toluene nitration 6](#_Toc199069291)

[4. Performance of toluene nitration in the first-stage microreactor 7](#_Toc199069292)

[4.1 Effect of flow rate ratio and temperature on reaction performance 7](#_Toc199069293)

[4.2 Effect of residence time on reaction performance 8](#_Toc199069294)

[5. Application of the microreaction strategy in benzene nitration 9](#_Toc199069295)

[5.1 Performance of benzene nitration 9](#_Toc199069296)

[5.2 Thermodynamic properties of benzene and mixed acid system 11](#_Toc199069297)

[6. Application of the microreaction strategy in chlorobenzene nitration 12](#_Toc199069298)

[6.1 Performance of chlorobenzene nitration 12](#_Toc199069299)

[6.2 Thermodynamic properties of benzene and mixed acid system 15](#_Toc199069300)

[7. Common laws of aromatic and mixed acid nitration systems 16](#_Toc199069301)

[7.1 Common laws of reaction kinetics 16](#_Toc199069302)

[7.2 Common laws of thermodynamics 16](#_Toc199069303)

[References 18](#_Toc199069304)

## 1. Derivation of Eq. (1)

where *x* is conversion, *c* is the concentration of substance, *k* is the observed reaction rate constant, *t* is the residence time. The superscript 0 represents the initial moment of the reaction, and the subscripts ar and N represent aromatic and HNO3, respectively. By integrating Eq. (S5), we can obtain:

## 2. Derivation of Eq. (2)

In the two-stage countercurrent microflow mode, there is still co-current microflow in each microreactor, and the reaction process conforms to the second-order reaction kinetics. The total residence time is equal to the sum of the residence times in the two microreactors. Assume that the initial molar concentration of aromatic in the first-stage microreactor is . The initial molar concentration of HNO3 in the second-stage microreactor is . The conversion rate of toluene in the first-stage microreactor is *x*ar,1. The residual concentration of aromatic at the outlet of the first-stage microreactor is . Therefore, the initial concentration of aromatic in the second-stage microreactor is . In the second-stage microreactor, the reaction rate equation is:

By integrating Eq. (S11), the residence time in the second-stage microreactor *t*2 can be obtained:

where *x*ar is the total target aromatic conversion.

According to the design of two-stage countercurrent, the initial concentration of HNO3 entering the first-stage microreactor is . The initial concentration of aromatic entering the first-stage microreactor is . Therefore, in the first-stage microreactor, the reaction rate equation is:

where the range of *x*ar is [0, *x*ar, 1].

By integrating Eq. (S16), the residence time in the first-stage microreactor *t*1 can be obtained:

In summary, the residence time of the tow-stage countercurrent microflow tt can be obtained:

## 3. Reaction network of toluene nitration

The mononitration reaction of toluene with mixed acid can produce *o*-nitrotoluene, *m*-nitrotoluene and *p*-nitrotoluene. The nitration reaction of *o*-nitrotoluene with mixed acid can produce 2,4-dinitrotoluene (2,4-DNT) and 2,6-dinitrotoluene (2,6-DNT). The nitration reaction of *p*-nitrotoluene with mixed acid can produce 2,4-DNT. Both 2,4-DNT and 2,6-DNT can further undergo nitration to produce 2,4,6-trinitrotoluene (TNT). Therefore, for the mononitration reaction of toluene, the reactions that produce DNT and TNT are both the over-nitration side reactions. The reaction network of toluene nitration is shown in Figure S1.

**
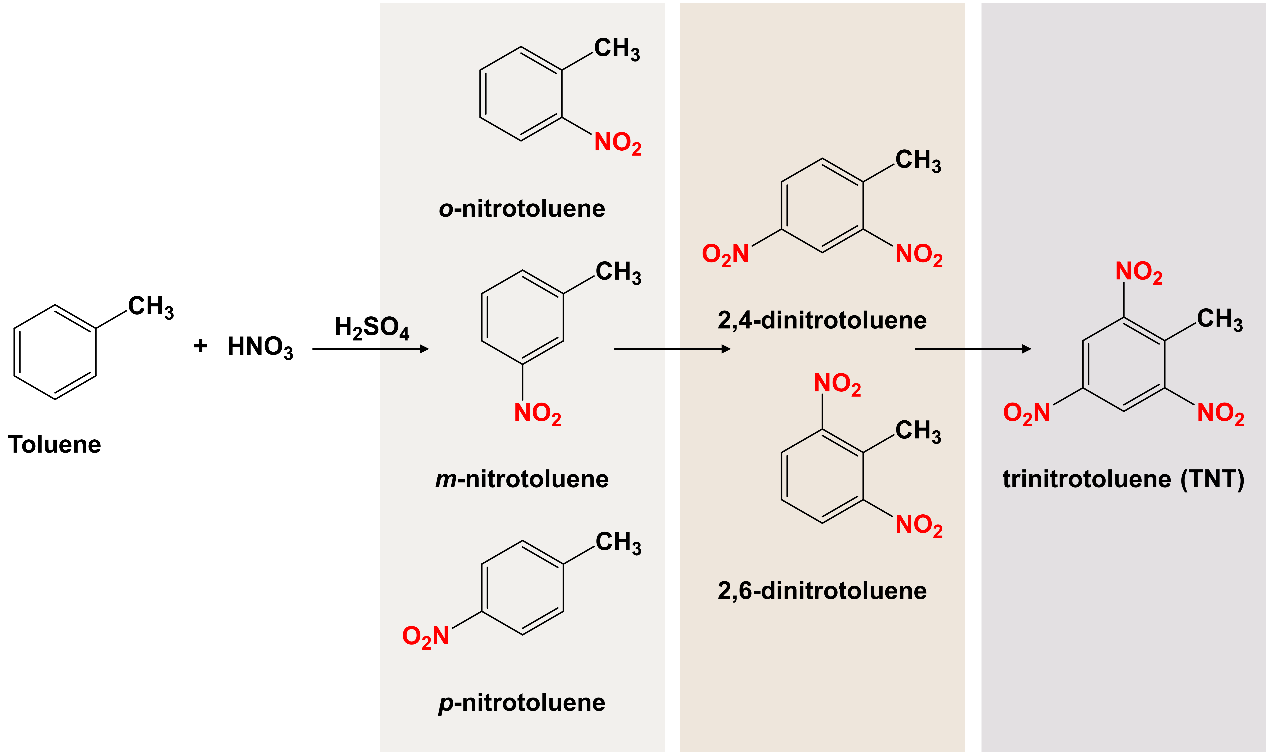
**

**Figure S1**. Reaction network of toluene nitration with mixed acid.

## 4. Performance of toluene nitration in the first-stage microreactor

### 4.1 Effect of flow rate ratio and temperature on reaction performance

In the first-stage microreactor, the initial molar ratio of toluene to HNO3 was 1:0.501. Therefore, the challenge of controlling over-nitration side reactions is significantly reduced compared to the second-stage microreactor. The effect of aqueous-to-organic flow rate ratio and temperature on the over-nitration behavior is shown in Figure S2. As shown in Figure S2(a), decreasing the dosage of H2SO4 increases the initial concentration of HNO3, thereby accelerating the reaction rate. As shown in Figure S2(b), when 1 < *Q*a/*Q*o < 3, a lower H2SO4 dosage enhances the dilution effect of H2O generated from the main reaction, effectively suppressing the over-nitration side reaction in-situ. When *Q*a/*Q*o > 3, the reaction rate is slower and the interface temperature rise of the system is reduced, thereby reducing the occurrence of the over-nitration side reaction due to the increase in system temperature. These observations align with previously reported trends, highlighting the intrinsic trade-off effect between spatiotemporal conversion rate and selectivity.

**
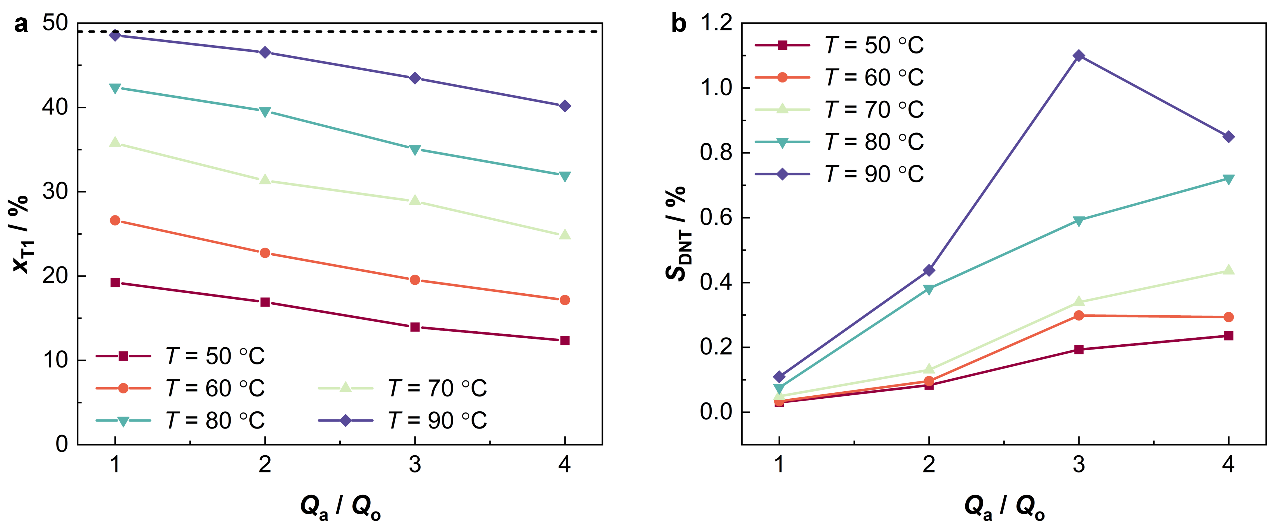
**

**Figure S2**. Effect of *Q*a/*Q*o and temperature on the (a) conversion of toluene and (b) selectivity of over-nitration side reaction in the first-stage microreactor.

### 4.2 Effect of residence time on reaction performance

The effect of residence time and temperature on the over-nitration behavior is shown in Figure S3. As shown in Figure S3(a), the reaction rate decreases with increasing residence time, consistent with second-order reaction kinetics. As shown in Figure S3(b), in the first-stage microreactor, the selectivity of over-nitration side reaction decreases as residence time increases. This shows that as the reaction proceeds, the concentration of H2SO4 decreases, thereby enhancing the inhibitory effect on over-nitration side reaction.


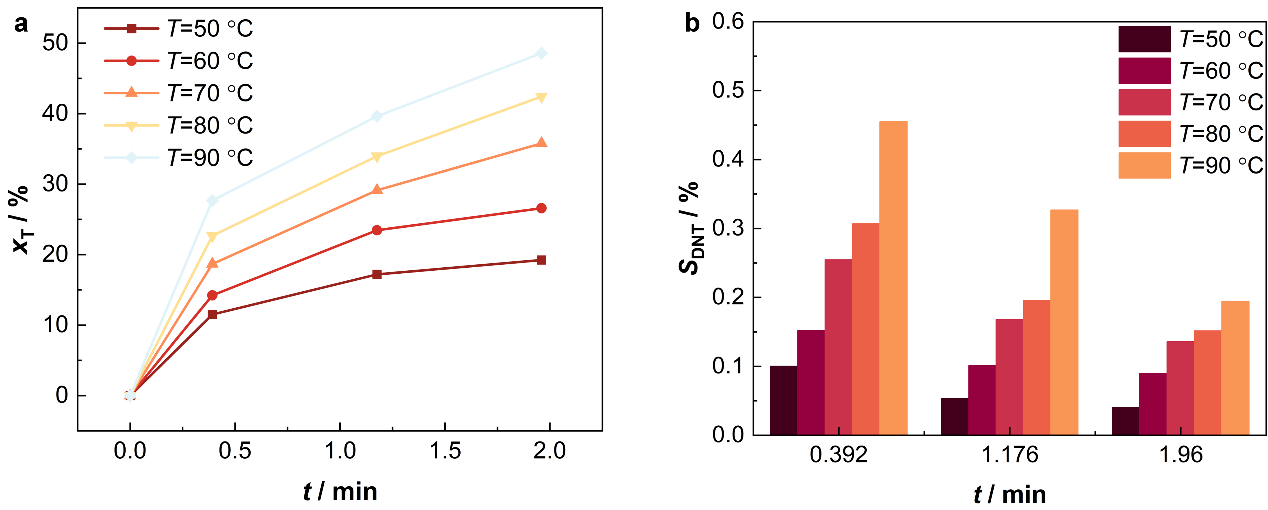


**Figure S3**. Effect of residence time on the (a) conversion of toluene and (b) selectivity of over-nitration side reaction in the first-stage microreactor.

## 5. Application of the microreaction strategy in benzene nitration

### 5.1 Performance of benzene nitration

The reaction network of benzene nitration is shown in Figure S4. The reaction mechanism of the benzene nitration with the mixed acid is the same as that of toluene nitration. But the reaction network of benzene nitration is simpler than that of toluene nitration. Moreover, based on the reaction mechanism of electrophilic substitution, the nitration activity of benzene is significantly lower than that of toluene. Therefore, the trade-off effect of benzene nitration is lower than that of toluene nitration.

The initial molar ratio of benzene to HNO3 is still set to 1:1.01. Therefore, according to the design principle of the two-stage countercurrent microflow mode, the process design of benzene nitration is shown in Figure S5.

**
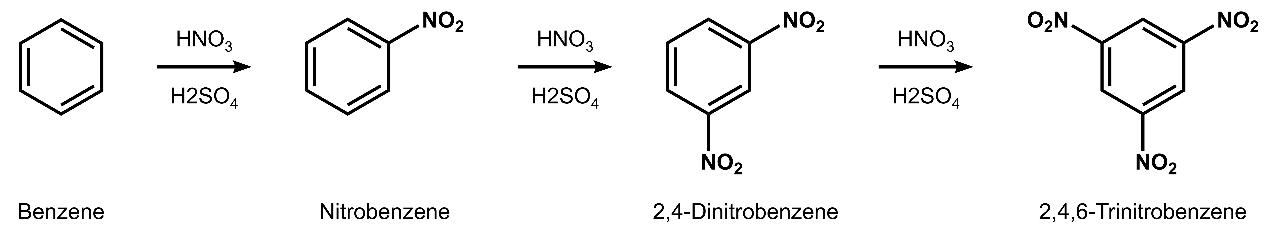
**

**Figure S4**. Reaction network of benzene nitration with mixed acid.


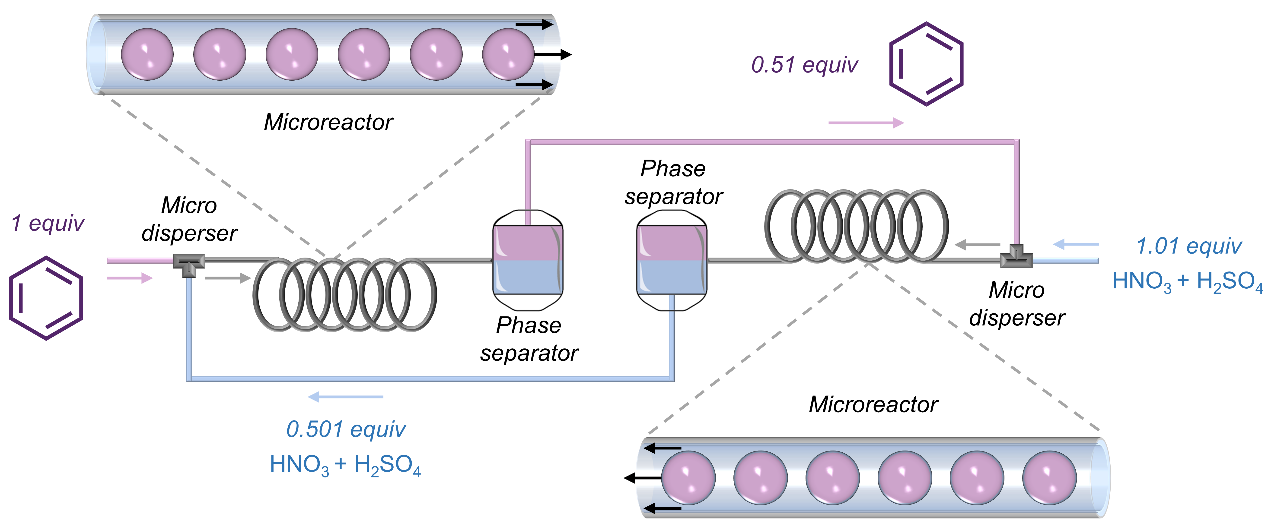


**Figure S5**. process design of benzene nitration.

The composition of the products of benzene nitration was detected by gas chromatography (GC-2014C, SHIMADZU, China). The detection method is shown in Table S1.

**Table S1**. Gas chromatography detection method for benzene nitration system

| Instrument | | Chromatographic column | | Carrier gas | Split Ratio | Total flow rate | Pressure |
| --- | --- | --- | --- | --- | --- | --- | --- |
| GC-2014C, SHIMADZU | | AE·SE-54 30 m*0.32 mm*0.33 μm | | N2 | 30:1 | 65 mL/min | 72.3 kPa |
| Detector | Injection volume | | Heating gradient curve | | | | |
| FID hydrogen flame detector | 20 μL | | *T*=90 ℃. Temperature holding time: 2 min. Heating rate: 10 ℃/min;  *T*=130 ℃. Temperature holding time: 2 min. Heating rate: 20 ℃/min;  *T*=200 ℃. Temperature holding time: 2 min. Heating rate: 20 ℃/min;  *T*=230 ℃. Temperature holding time: 3 min. | | | | |

The performance of benzene nitration using the proposed microreaction strategy is shown in Table S2. Compared to literature reports1, this approach achieves higher benzene conversion and nitrobenzene selectivity with less HNO3 dosage. Notably, over-nitration by-products are nearly undetectable in the final product.

**Table S2**. Performance of benzene nitration based on different reaction modes

| Reaction mode | *T* / ℃ | *W*H2SO4 / % | *M* | *Q*a/*Q*o | *t* / min | *x*B / % | *S*DNB / % |
| --- | --- | --- | --- | --- | --- | --- | --- |
| Two-stage countercurrent microflow | 90 | 75 | 1.01 | 1 | 2.0 | > 99.9 | > 99.9 |
| Single-stage co-current microflow1 | 70 | 71.5 | 1.05 | — | 2.2 | 99.5 | 99.6 |

### 5.2 Thermodynamic properties of benzene and mixed acid system

The solubility of benzene and nitrobenzene in H2SO4 was further studied, as shown in Figure S6. Benzene is a typical non-polar molecule, while concentrated sulfuric acid is a highly polar strong acid. As shown in Figure S6, benzene is completely insoluble in 70% ~ 85% H2SO4. In contrast, the introduction of a nitro group significantly increases the molecular polarity of nitrobenzene, thereby enhancing its solubility in H2SO4.


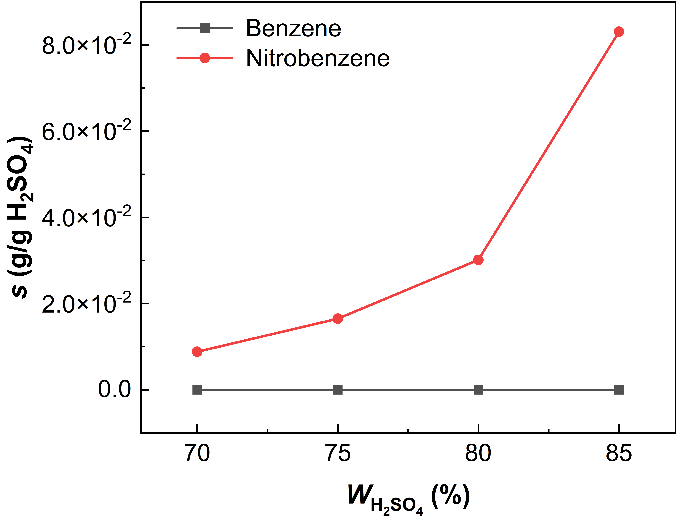


**Figure S6**. Solubility of benzene and nitrobenzene in H2SO4 of different concentrations.

Consistent with the toluene nitration system, a decrease in H2SO4 concentration significantly reduces the solubility difference between benzene and nitrobenzene. Therefore, at low H2SO4 dosage, the water produced by benzene nitration will also significantly reduce the solubility of nitrobenzene in sulfuric acid, thereby avoiding the occurrence of over-nitration side reactions. Critically, the implementation of the two-stage countercurrent microflow mode effectively compensates for the reduced benzene nitration rate resulting from lower H2SO4 concentrations. Therefore, the trade-off effect of benzene nitration was effectively overcome by adopting the novel microreaction strategy.

## 6. Application of the microreaction strategy in chlorobenzene nitration

### 6.1 Performance of chlorobenzene nitration

The reaction network of chlorobenzene nitration is illustrated in Figure S7. Due to the electron-withdrawing characteristic of the –Cl substituent, the electrophilic reactivity of the aromatic ring is diminished, leading to a slower nitration rate compared to benzene nitration. The microreaction strategy developed in this work is also applied to chlorobenzene to overcome the inherent trade-off between spatiotemporal conversion rate and selectivity. The corresponding reaction process is depicted in Figure S8.

**
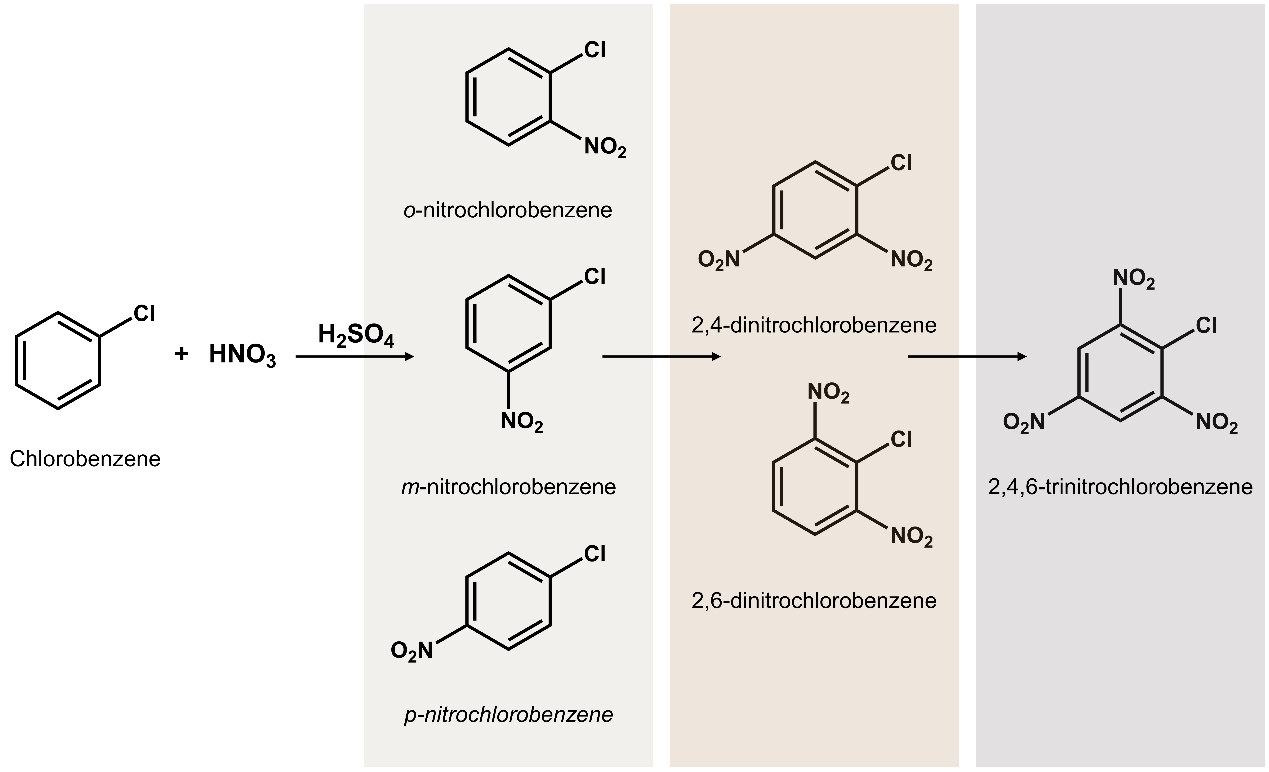
**

**Figure S7**. Reaction network of chlorobenzene nitration with mixed acid.


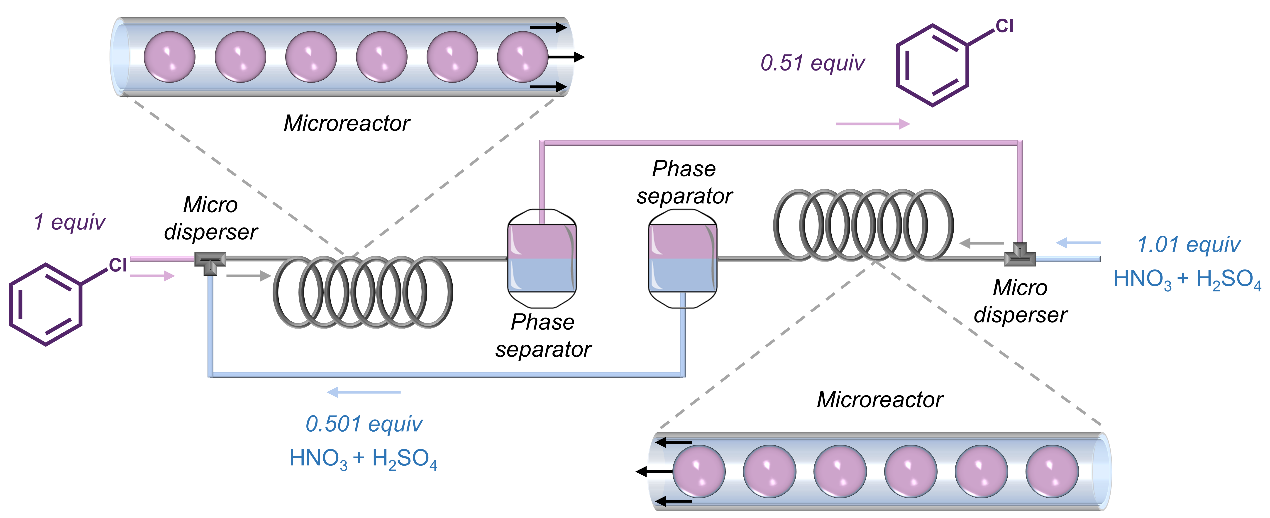


**Figure S8**. process design of chlorobenzene nitration.

The composition of the products of chlorobenzene nitration was also detected by gas chromatography (GC-2014C, SHIMADZU, China). The detection method is shown in Table S1.

**Table S3**. Gas chromatography detection method for chlorobenzene nitration system

| Instrument | | Chromatographic column | | Carrier gas | Split Ratio | Total flow rate | Pressure |
| --- | --- | --- | --- | --- | --- | --- | --- |
| GC-2014C, SHIMADZU | | AE·SE-54 30 m*0.32 mm*0.33 μm | | N2 | 30:1 | 65 mL/min | 72.3 kPa |
| Detector | Injection volume | | Heating gradient curve | | | | |
| FID hydrogen flame detector | 20 μL | | *T*=90 ℃. Temperature holding time: 2 min. Heating rate: 10 ℃/min;  *T*=130 ℃. Temperature holding time: 2 min. Heating rate: 20 ℃/min;  *T*=200 ℃. Temperature holding time: 2 min. Heating rate: 20 ℃/min;  *T*=230 ℃. Temperature holding time: 3 min. | | | | |

The performance of chlorobenzene nitration using the proposed microreaction strategy is shown in Table S4. Compared to literature reports, this approach achieves higher chlorobenzene conversion and nitrochlorobenzene selectivity with less HNO3 dosage. The over-nitration by-products are not undetectable in the final product.

**Table S4**. Performance of chlorobenzene nitration based on different reaction modes

| Reaction mode | *T* / ℃ | *W*H2SO4 / % | *M* | *Q*a/*Q*o | *t* / min | *x*B / % | *S*NCB / % |
| --- | --- | --- | --- | --- | --- | --- | --- |
| Two-stage countercurrent microflow | 90 | 80 | 1.01 | 1 | 4 | > 99.9 | 99.99 |
| Single-stage co-current microflow2 | 90 | 90 | 1.2 | — | 1 | 96.39 | 97.47 |

### 6.2 Thermodynamic properties of benzene and mixed acid system

The solubility of chlorobenzene and nitrochlorobenzene in H2SO4 was further studied, as shown in Figure S9. Chlorobenzene is more polar than benzene. As shown in Figure S9, chlorobenzene can be partially dissolved in concentrated H2SO4. Nitrochlorobenzene is more polar, and its solubility in sulfuric acid solution is always higher than that of chlorobenzene. Consistent with the nitration system of toluene and benzene, the solubility difference between nitrochlorobenzene and chlorobenzene is significantly reduced as the concentration of H2SO4 decreases. This indicates that the product inhibition mechanism driven by thermodynamic property regulation is also applicable to the nitration of chlorobenzene.

**
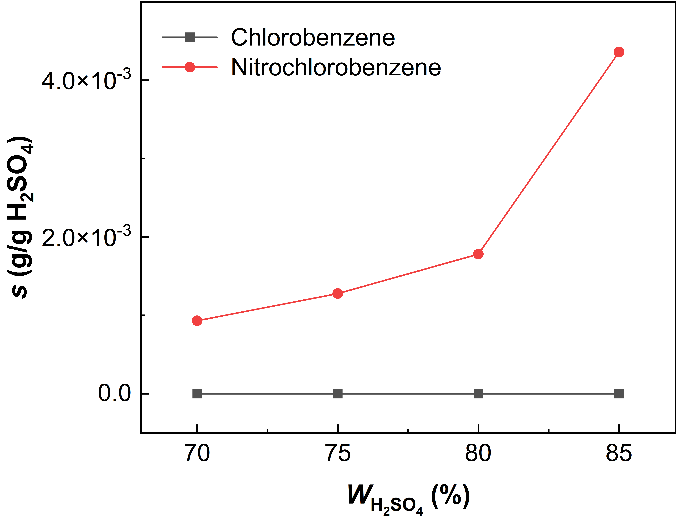
**

**Figure S9**. Solubility of chlorobenzene and nitrochlorobenzene in H2SO4 of different concentrations.

## 7. Common laws of aromatic and mixed acid nitration systems

### 7.1 Common laws of reaction kinetics

The two-stage countercurrent microflow mode is completely based on the kinetics of the second-order reaction. Its advantages in improving the total spatiotemporal conversion rate and reducing the system interface temperature rise are applicable to all second-order reactions. Combined with the advantages of microreactors in intensifying the transport process, the system temperature can be controlled more accurately. The aromatic nitration reaction mechanism with mixed acid follows the electrophilic substitution reaction mechanism, and the reaction order is second-order. Therefore, the two-stage countercurrent mode is applicable to the nitration reaction of aromatics.

### 7.2 Common laws of thermodynamics

The introduction of nitro (-NO2) will enhance the polarity of the benzene ring, which is a common law in aromatic nitration process. This means that the solubility of aromatic nitration products in H2SO4 is always higher than that of aromatics. As the concentration of H2SO4 decreases, the solubility of nitroaromatics will always decrease more than that of aromatics, thus narrowing the difference in solubility of the two substances in H2SO4. Therefore, the effect of reducing the dosage of H2SO4 to enhance product inhibition is universal for aromatic nitration reactions. The product inhibition mechanism based on the thermodynamic property regulation is widely applicable to suppressing the over-nitration side reaction process in aromatic nitration.

At the same time, the reduction in the dosage of H2SO4 will increase the initial concentration of HNO3, which will accelerate the nitration reaction rate and reaction exothermic rate. The two-stage countercurrent microflow mode improves the spatiotemporal conversion rate while reducing the interface temperature rise through process design. Therefore, the coordinated use of thermodynamic and kinetic control methods is a universal method to overcome the trade-off effect between spatiotemporal conversion rate and reaction selectivity in aromatic nitration.

## References

1. Zhao W*, et al.* Safe, Green, and Efficient Synthesis of m-Dinitrobenzene via Two-Step Nitration in a Continuous-Flow Microreactor. **8**, e202204997 (2023).

2. Han B-C, Chen Y-D, Zou H-W, Yu G-G, Sheng C, Wang G-Z. Study on characteristics of toluene/chlorobenzene nitrification in different microreactors. *Chemical Engineering Research and Design* **205**, 343-353 (2024).
